# Supplementary material for: A mouse model to study persistent fatigue
Source: Research Square preprint supplement (doi:10.21203/rs.3.rs-9335120/v1), 2026-04-30
Supplement: Supplementary file 1 [file a891c86ab5f510857030c083.docx]

| **Cytokine** | **Group** | **Sex** | **Group*Sex** |
| --- | --- | --- | --- |
| **IFN-γ** | 0.083 | 0.470 | 0.185 |
| **TNF-α** | 0.187 | 0.068 | 0.369 |
| **IL-1β** | 0.609 | 0.657 | 0.358 |
| **IL-2** | 0.995 | 0.723 | 0.379 |
| **IL-5** | 0.143 | <0.001 | 0.907 |
| **IL-6** | 0.467 | 0.299 | 0.518 |
| **IL-10** | 0.273 | 0.291 | 0.338 |
| **KC-GRO** | 0.358 | 0.416 | 0.285 |
| **TGF-β1** | 0.645 | 0.549 | 0.512 |

Table 1

Table 2

| **Metabolite** | **p-value** |
| --- | --- |
| **Oleic acid** | <0.001 |
| **Sedoheptulose** | 0.002 |
| **Mannose** | 0.003 |
| **Pyridoxine PN** | 0.004 |
| **Indoleacetic acid** | 0.005 |
| **Adenine** | 0.006 |
| **Proline** | 0.008 |
| **Stearate** | 0.009 |
| **beta Hydroxybutyrate 3 Hydroxybutyrate** | 0.01 |
| **Heptanoic acid** | 0.011 |
| **Uridine** | 0.011 |
| **Pyridoxal PL** | 0.012 |
| **Lauric acid** | 0.015 |
| **Linoleate** | 0.023 |
| **Heptadecanoic acid** | 0.024 |
| **Palmitate** | 0.026 |
| **Pterin** | 0.027 |
| **Kynurenine** | 0.027 |
| **Hypoxanthine** | 0.031 |
| **Alanine** | 0.041 |
| **Ornithine** | 0.045 |
| **Fructose** | 0.046 |
| **Glycerate** | 0.049 |
| **Tryptophol** | 0.052 |
| **Citrulline** | 0.055 |
| **Inosine** | 0.056 |
| **Uracil** | 0.06 |
| **Tryptamine** | 0.069 |
| **Phenylalanine** | 0.084 |
| **Succinate** | 0.087 |
| **Indolepropionic acid** | 0.097 |
| **Xylose** | 0.102 |
| **Myristic acid** | 0.108 |
| **Cholesterol** | 0.121 |
| **Glucose** | 0.121 |
| **Dihydroxyphenylalanine DOPA** | 0.126 |
| **Glycine** | 0.132 |
| **Creatinine** | 0.153 |
| **Linolenic acid** | 0.163 |
| **Phosphoenolpyruvate** | 0.171 |
| **Xanthine** | 0.172 |
| **Histidine** | 0.177 |
| **Isocitrate** | 0.189 |
| **Erythrose** | 0.207 |
| **Citrate** | 0.218 |
| **Undecanoic acid** | 0.223 |
| **Nonanoic acid** | 0.251 |
| **N Acetylaspartate** | 0.28 |
| **Gamma aminobutyric acid GABA** | 0.281 |
| **Methionine** | 0.285 |
| **alpha Ketoisovalerate KIV** | 0.286 |
| **Tyrosine** | 0.303 |
| **Homocysteine** | 0.305 |
| **Pyruvate** | 0.34 |
| **N Acetylmethionine** | 0.356 |
| **Arachidonate** | 0.358 |
| **2 Oxoadipate** | 0.366 |
| **Asparagine** | 0.405 |
| **Serine** | 0.412 |
| **Histamine** | 0.415 |
| **3 Hydroxypropionate** | 0.431 |
| **2 Hydroxybutyrate** | 0.433 |
| **Adonitol** | 0.468 |
| **Ribose** | 0.476 |
| **3 Hydroxyanthranilic acid** | 0.479 |
| **Orotate** | 0.484 |
| **Ribose 5 phosphate** | 0.486 |
| **Inotisol** | 0.555 |
| **Tridecanoic acid** | 0.555 |
| **3 Phosphoglycerate** | 0.567 |
| **N acetylglutamate** | 0.567 |
| **Itaconic acid** | 0.577 |
| **Indolealdehyde** | 0.579 |
| **Kynurenic acid** | 0.581 |
| **Aminoadipate** | 0.594 |
| **Gluconic acid** | 0.597 |
| **Urea** | 0.598 |
| **alpha Ketoglutarate** | 0.606 |
| **Aspartate** | 0.609 |
| **Threonine** | 0.615 |
| **Cysteine** | 0.618 |
| **Dihydroxyacetone phosphate DHAP** | 0.644 |
| **Nicotinuric acid** | 0.663 |
| **Taurine** | 0.666 |
| **Mevalonic acid** | 0.696 |
| **Lysine** | 0.701 |
| **O Phosphoethanolamine** | 0.754 |
| **Malonate** | 0.756 |
| **Fructose 6 phosphate** | 0.76 |
| **beta Alanine** | 0.776 |
| **Glucose 6 phosphate** | 0.779 |
| **Malate** | 0.802 |
| **alpha Keto beta Methylvalerate KMV** | 0.814 |
| **N Acetylserine** | 0.82 |
| **Glutamine** | 0.831 |
| **2 Hydroxyglutarate** | 0.847 |
| **Leucine** | 0.848 |
| **N Acetylglutamine** | 0.858 |
| **Glycerol** | 0.88 |
| **Hypotaurine** | 0.887 |
| **Anthranilic acid** | 0.899 |
| **Valine** | 0.904 |
| **Picolinic acid** | 0.906 |
| **Methylmalonate** | 0.908 |
| **Cytosine** | 0.909 |
| **Thymine** | 0.913 |
| **Homoserine** | 0.918 |
| **Glutamate** | 0.918 |
| **Dopamine** | 0.923 |
| **Aconitate** | 0.931 |
| **beta Hydroxy beta Methylbutyric acid HMB** | 0.933 |
| **alpha Ketoisocaproate KIC** | 0.941 |
| **Ribulose 5 phosphate** | 0.951 |
| **3 Hydroxypyruvate** | 0.954 |
| **Fumarate** | 0.957 |
| **Lactate** | 0.962 |
| **6 Phosphogluconate** | 0.981 |
| **Isoleucine** | 0.992 |
| **Indolelactic acid** | 0.996 |
| **Tryptophan** | 0.996 |
